# Supplementary material for: Cross-cultural adaptation and psychometric evaluation of the French version of the Gilles de la Tourette Syndrome Quality of Life Scale (GTS-QOL)
Source: PubMed Central journal article supplement (PMC7755204; doi:10.1371/journal.pone.0243912), 2020-12-22
Supplement: pone.0243912.s001.pdf [file pone.0243912.s001.pdf]

## The GTS-QOL-French questionnaire

Les problèmes de santé peuvent affecter la qualité de vie d'une personne de différentes manières. Ce questionnaire étudie la manière dont votre maladie influe sur votre bien-être.

Merci de mettre une croix dans la case correspondant à la réponse la plus adaptée à votre ressenti.

Il est à noter que cette liste inclut de nombreux problèmes que vous ne rencontrerez probablement jamais.

| Durant les quatre dernières semaines avez-vous :                                                               | Aucun problème           | Problème léger           | Problème modéré          | Problème important       | Problème très important  |
|----------------------------------------------------------------------------------------------------------------|--------------------------|--------------------------|--------------------------|--------------------------|--------------------------|
| 1. été incapable de contrôler tous vos mouvements ?                                                            | <input type="checkbox"/> | <input type="checkbox"/> | <input type="checkbox"/> | <input type="checkbox"/> | <input type="checkbox"/> |
| 2. eu des difficultés dans vos activités de la vie quotidienne ou vos loisirs (comme cuisiner, écrire) ?       | <input type="checkbox"/> | <input type="checkbox"/> | <input type="checkbox"/> | <input type="checkbox"/> | <input type="checkbox"/> |
| 3. souffert de douleurs ou de blessures physiques secondaires à vos tics ?                                     | <input type="checkbox"/> | <input type="checkbox"/> | <input type="checkbox"/> | <input type="checkbox"/> | <input type="checkbox"/> |
| 4. été gêné(e) par des bruits que vous ne pouvez vous empêcher de faire ?                                      | <input type="checkbox"/> | <input type="checkbox"/> | <input type="checkbox"/> | <input type="checkbox"/> | <input type="checkbox"/> |
| 5. redouté de dire des gros mots que vous n'aviez pas l'intention de dire ?                                    | <input type="checkbox"/> | <input type="checkbox"/> | <input type="checkbox"/> | <input type="checkbox"/> | <input type="checkbox"/> |
| 6. redouté de faire quelque chose d'embarrassant (comme des gestes grossiers) ?                                | <input type="checkbox"/> | <input type="checkbox"/> | <input type="checkbox"/> | <input type="checkbox"/> | <input type="checkbox"/> |
| 7. été obligé(e) de répéter des mots encore et encore ?                                                        | <input type="checkbox"/> | <input type="checkbox"/> | <input type="checkbox"/> | <input type="checkbox"/> | <input type="checkbox"/> |
| 8. été obligé(e) de refaire ou de répéter des choses que d'autres personnes font ou disent (imiter les gens) ? | <input type="checkbox"/> | <input type="checkbox"/> | <input type="checkbox"/> | <input type="checkbox"/> | <input type="checkbox"/> |
| 9. été obligé(e) de faire des choses d'une manière répétée et d'une certaine façon (comme vérifier, toucher) ? | <input type="checkbox"/> | <input type="checkbox"/> | <input type="checkbox"/> | <input type="checkbox"/> | <input type="checkbox"/> |
| 10. eu des pensées ou des images déplaisantes vous passant par la tête ?                                       | <input type="checkbox"/> | <input type="checkbox"/> | <input type="checkbox"/> | <input type="checkbox"/> | <input type="checkbox"/> |
| 11. eu des difficultés de concentration ?                                                                      | <input type="checkbox"/> | <input type="checkbox"/> | <input type="checkbox"/> | <input type="checkbox"/> | <input type="checkbox"/> |
| 12. eu des problèmes de mémoire ?                                                                              | <input type="checkbox"/> | <input type="checkbox"/> | <input type="checkbox"/> | <input type="checkbox"/> | <input type="checkbox"/> |

|                                                                                                     |                          |                          |                          |                          |                          |
|-----------------------------------------------------------------------------------------------------|--------------------------|--------------------------|--------------------------|--------------------------|--------------------------|
| 13. perdu ou égaré des objets importants (comme un portefeuille, des clefs, un téléphone mobile) ?  | <input type="checkbox"/> | <input type="checkbox"/> | <input type="checkbox"/> | <input type="checkbox"/> | <input type="checkbox"/> |
| 14. eu des difficultés à finir ce que vous avez commencé ?                                          | <input type="checkbox"/> | <input type="checkbox"/> | <input type="checkbox"/> | <input type="checkbox"/> | <input type="checkbox"/> |
| 15. eu l'impression dans l'ensemble d'être en mauvaise santé ?                                      | <input type="checkbox"/> | <input type="checkbox"/> | <input type="checkbox"/> | <input type="checkbox"/> | <input type="checkbox"/> |
| 16. été triste ou déprimé ?                                                                         | <input type="checkbox"/> | <input type="checkbox"/> | <input type="checkbox"/> | <input type="checkbox"/> | <input type="checkbox"/> |
| 17. ressenti des changements d'humeur rapides ?                                                     | <input type="checkbox"/> | <input type="checkbox"/> | <input type="checkbox"/> | <input type="checkbox"/> | <input type="checkbox"/> |
| 18. ressenti un manque de confiance en soi ?                                                        | <input type="checkbox"/> | <input type="checkbox"/> | <input type="checkbox"/> | <input type="checkbox"/> | <input type="checkbox"/> |
| 19. ressenti de l'angoisse ?                                                                        | <input type="checkbox"/> | <input type="checkbox"/> | <input type="checkbox"/> | <input type="checkbox"/> | <input type="checkbox"/> |
| 20. ressenti de l'énervement ?                                                                      | <input type="checkbox"/> | <input type="checkbox"/> | <input type="checkbox"/> | <input type="checkbox"/> | <input type="checkbox"/> |
| 21. eu des difficultés à garder votre calme ?                                                       | <input type="checkbox"/> | <input type="checkbox"/> | <input type="checkbox"/> | <input type="checkbox"/> | <input type="checkbox"/> |
| 22. eu l'impression de ne pas contrôler votre vie ?                                                 | <input type="checkbox"/> | <input type="checkbox"/> | <input type="checkbox"/> | <input type="checkbox"/> | <input type="checkbox"/> |
| 23. ressenti de la frustration ?                                                                    | <input type="checkbox"/> | <input type="checkbox"/> | <input type="checkbox"/> | <input type="checkbox"/> | <input type="checkbox"/> |
| 24. ressenti le besoin de plus d'aide ou de soutien des autres ?                                    | <input type="checkbox"/> | <input type="checkbox"/> | <input type="checkbox"/> | <input type="checkbox"/> | <input type="checkbox"/> |
| 25. eu des difficultés à voir vos amis ?                                                            | <input type="checkbox"/> | <input type="checkbox"/> | <input type="checkbox"/> | <input type="checkbox"/> | <input type="checkbox"/> |
| 26. eu des difficultés à prendre part à des activités sociales (comme aller manger à l'extérieur) ? | <input type="checkbox"/> | <input type="checkbox"/> | <input type="checkbox"/> | <input type="checkbox"/> | <input type="checkbox"/> |
| 27. eu le sentiment d'être seul(e) ou isolé(e) ?                                                    | <input type="checkbox"/> | <input type="checkbox"/> | <input type="checkbox"/> | <input type="checkbox"/> | <input type="checkbox"/> |

Merci d'indiquer à quel point vous vous sentez dans l'ensemble satisfait de votre vie en ce moment, en mettant une croix entre 0 et 100 sur la ligne ci-dessous.

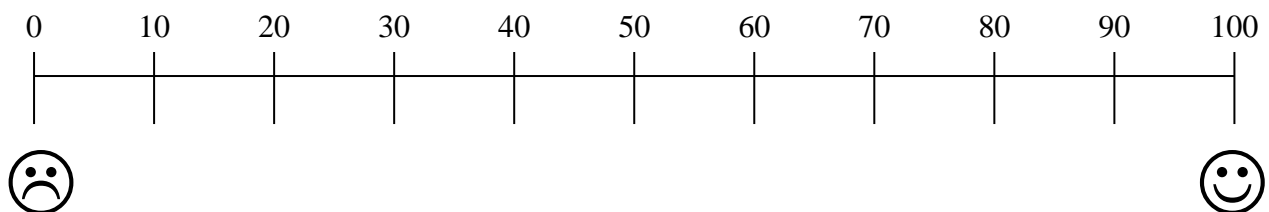

Extrêmement insatisfait de ma vie

Extrêmement satisfait de ma vie

Merci beaucoup d'avoir répondu à ce questionnaire !
